# Supplementary material for: Protective T cell immunity in mice following protein-TLR7/8 agonist-conjugate immunization requires aggregation, type I IFN, and multiple DC subsets
Source: JCI journal article supplement (doi:10.1172/jci45416), 2011-04-25
Supplement: sd1 [file 1]

**Figure S1**

**A)**

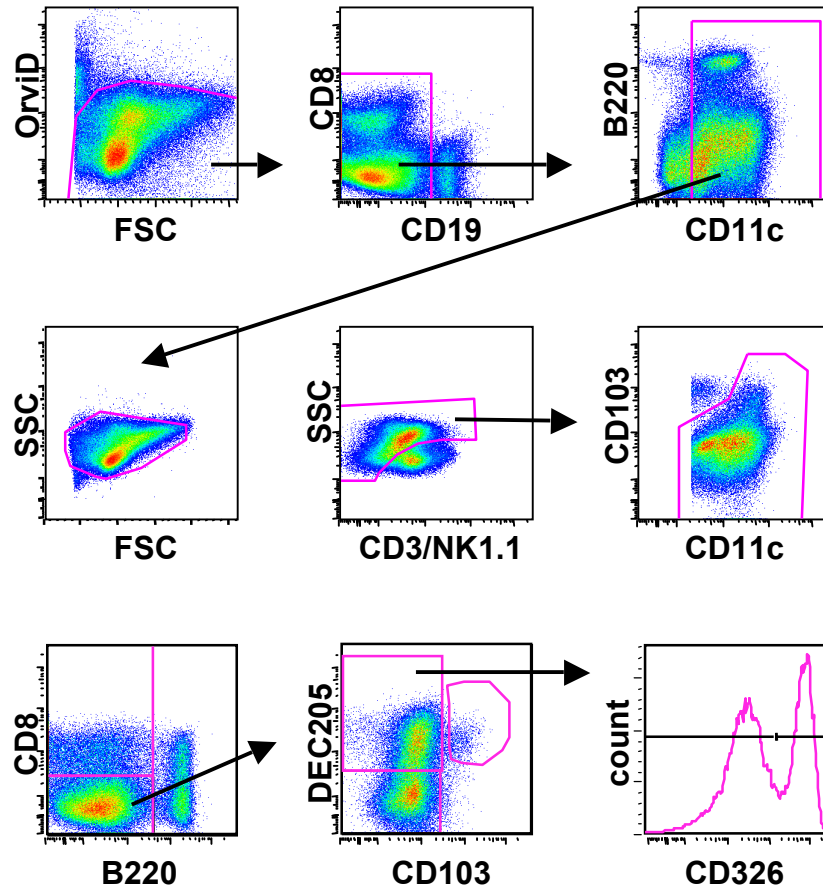

**B)**

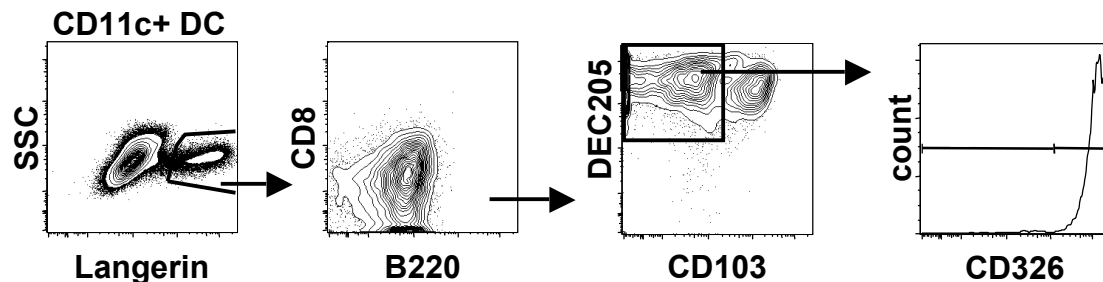

**Figure S1: Phenotypic characterization of DC subpopulations.** DLNs were harvested and pooled 48h post immunization with OVA-conjugate. (A) Alternative gating strategy to purify CD11c<sup>+</sup> DCs. Dead cells of positively (CD11c<sup>+</sup>) enriched DCs were excluded using the viability dye LIVE/DEAD® Fixable Orange Dead Cell Stain (OrViD). Remaining T, NK and B cells were further excluded by CD3, NK1.1 and CD19 staining, respectively. DCs were categorized by the basis of CD11c<sup>+</sup> expression. DC subsets were described by their expression of CD8, B220, CD103, DEC205 and CD326. (B) To analyze the expression of langerin on all DC subsets, an intracellular staining with AF488-labeled Langerin was added to the DC staining panel. Langerin<sup>+</sup> CD11c<sup>+</sup> cells were overlaid on the DC gating tree to display only Langerin-expressing DC populations. These data show that langerin is not expressed on CD8<sup>+</sup> DCs or CD8-DEC205+CD103-CD326- dermal DCs. By contrast, Langerin is expressed on CD8-DEC205+CD103-CD326+ (epidermal LC) and CD8-DEC205+CD103+ dermal DCs.

**Figure S2**

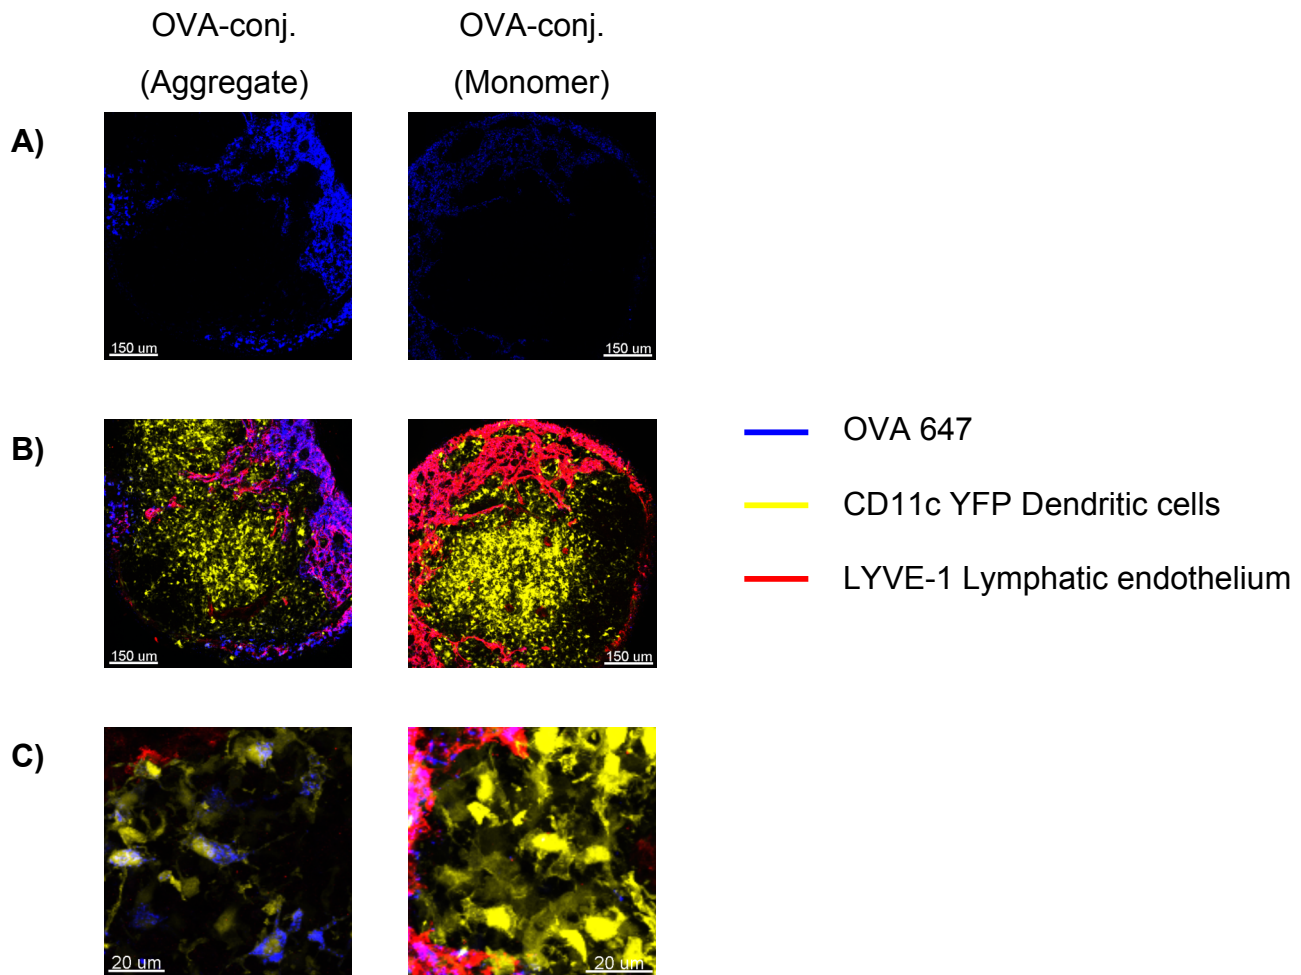

**Figure S2: Aggregated OVA accumulates in the medullary sinus, is acquired by resident DCs, and shuttled by migratory DCs.** Footpads of CD11cYFP mice were injected with AF647-labeled aggregated or monomeric OVA-conjugate. 6h later popliteal LNs were harvested, sectioned and analyzed by confocal microscopy. (A) Comparison of signal intensity acquired at identical settings of aggregated vs. monomeric AF647-labeled OVA (blue). (B) and (C) co-localization of OVA (blue), LYVE-1 (red) and CD11c (yellow) at different magnifications (20x/63x). Data are representative of at least two independent experiments.

**Figure S3**

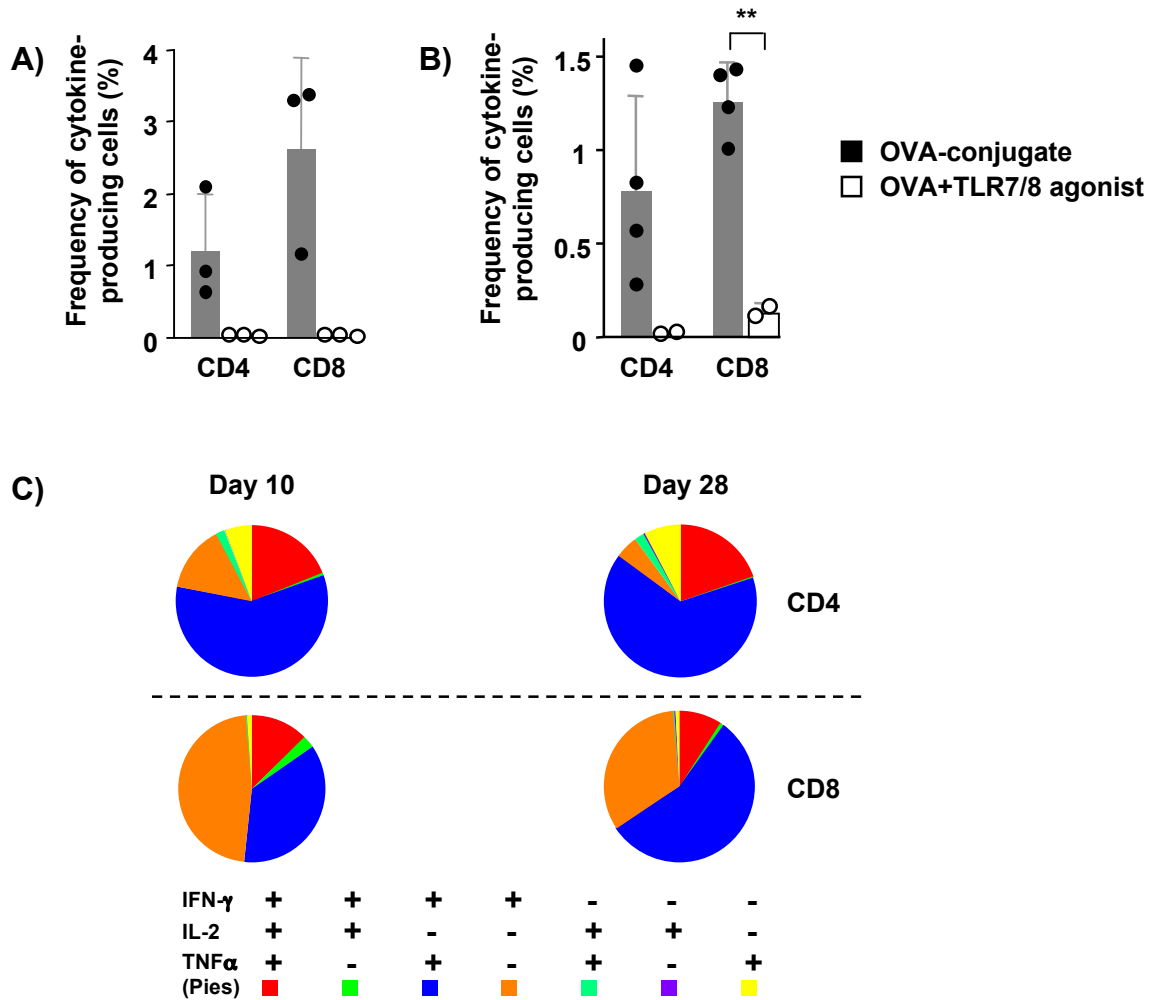

**Figure S3: OVA-conjugate induces durable memory responses.** Mice (n=7) were immunized s.c. with 20 $\mu$ g OVA plus free TLR7/8 agonist or the OVA-conjugate vaccine. (A and B) The frequency of OVA-specific IFN- $\gamma$ , IL-2 or TNF $\alpha$  producing CD4+ or CD8+ T cells was assessed in spleen 10 (A) and 28 (B) days after the first immunization. (C) Pie charts represent the proportion of OVA-specific CD4+ or CD8+ T cells producing IFN- $\gamma$ , IL-2, or TNF $\alpha$  alone or in any combination. (\*\*, p < 0.01).

**Figure S4**

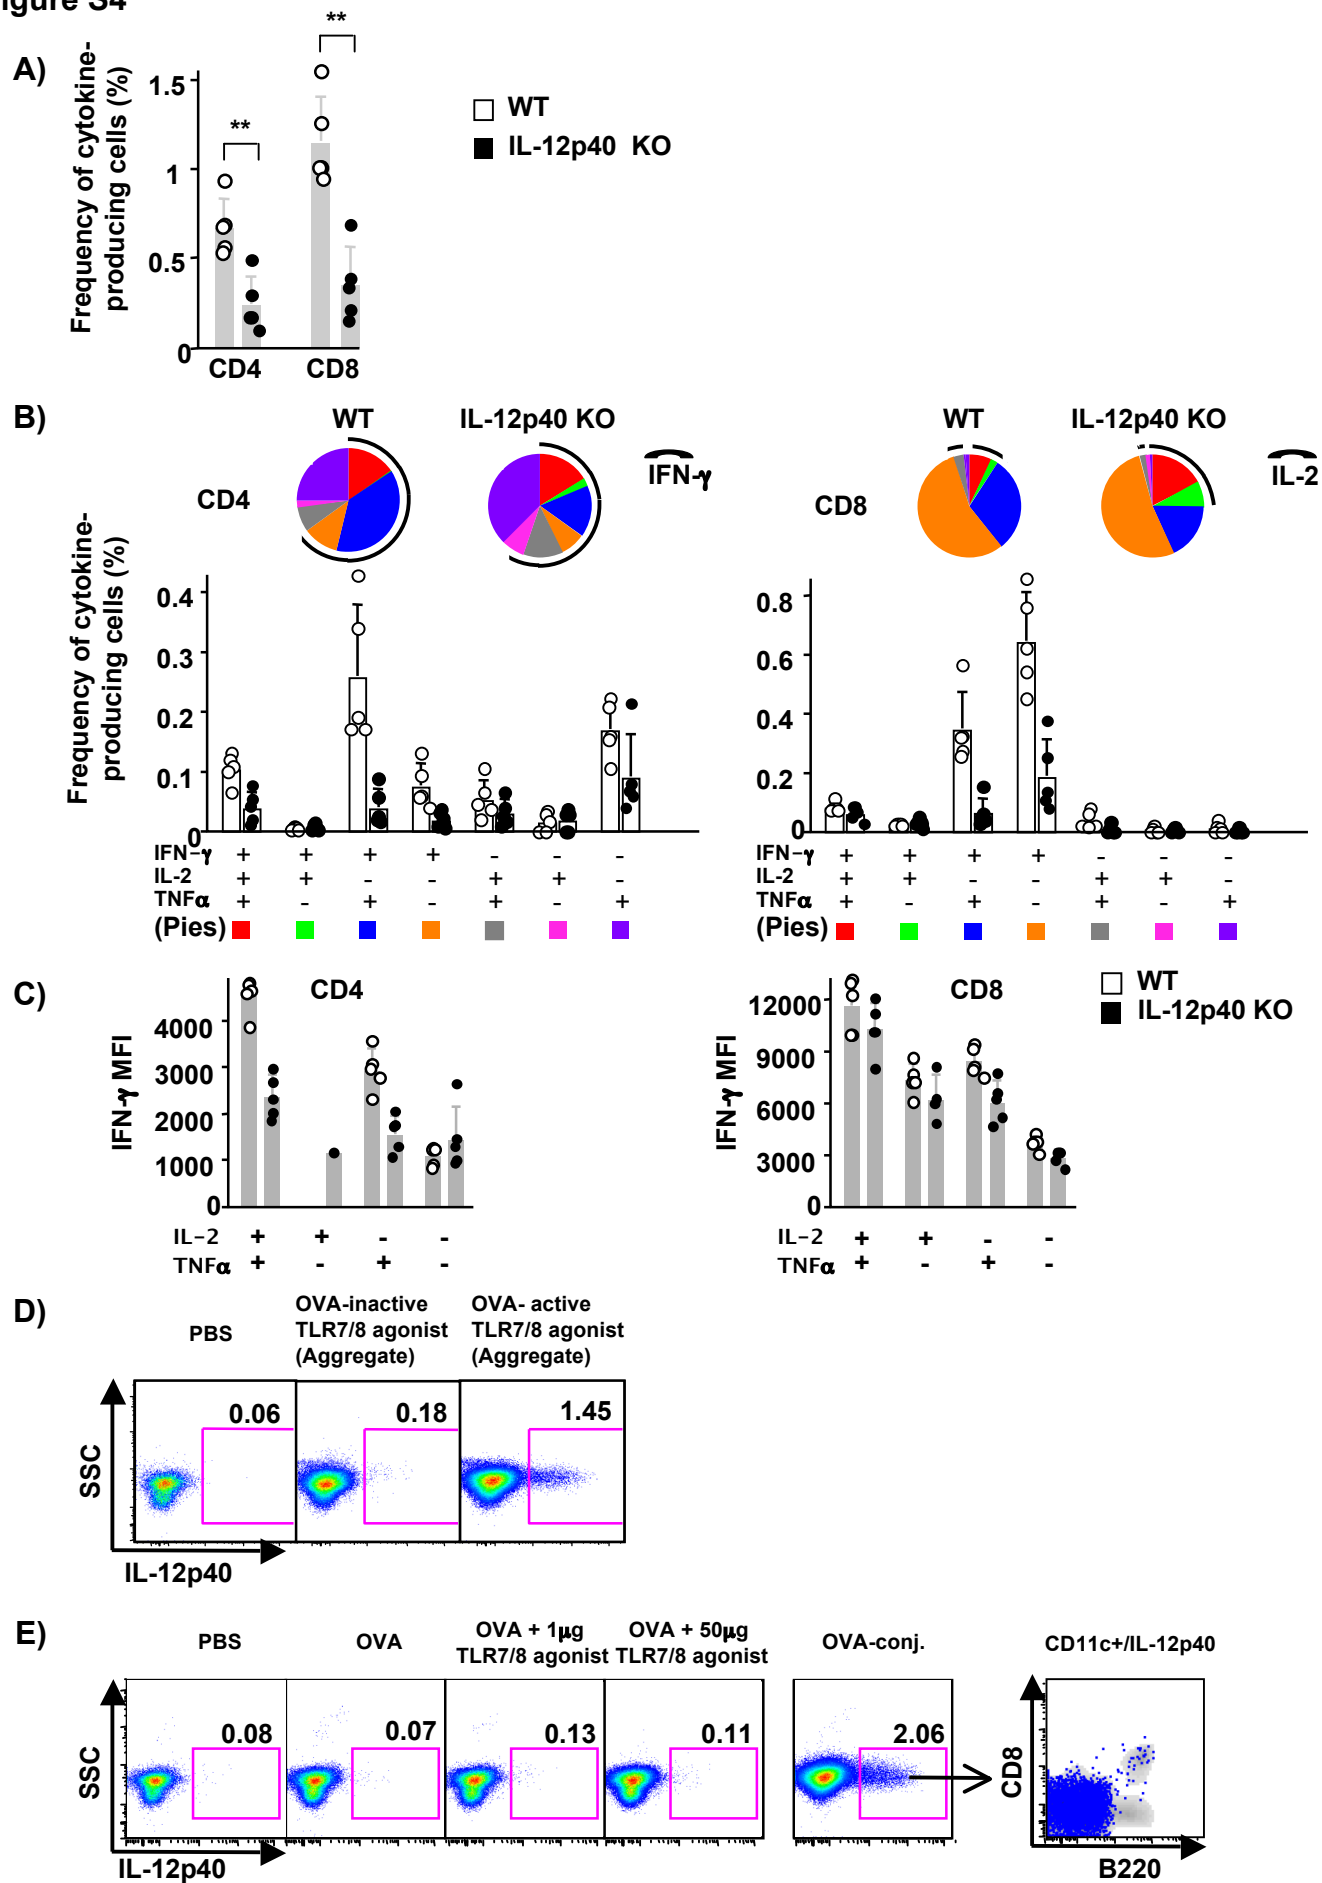

**Figure S4: Priming of OVA-specific T cells requires IL-12p40.** B6 and IL-12p40KO mice (n=5/group) were immunized as described above. (A-C) One week after the second immunization splenocytes were analyzed for cytokine producing T cells.

(A) Total frequency of IFN- $\gamma$ , IL-2 or TNF $\alpha$  producing OVA-specific CD4 $^{+}$  and CD8 $^{+}$  T cells. (B) Pie charts represent the relative contribution of multifunctional T cells making IFN- $\gamma$ , IL-2 or TNF $\alpha$  alone or in any combination. The black arc highlights the total proportions of IFN- $\gamma$  producing CD4 $^{+}$  T cells or IL-2 producing CD8 $^{+}$  T cells.

(C) Mean fluorescence intensity (MFI) of IFN- $\gamma$  staining of cytokine producing OVA-specific CD4 $^{+}$  and CD8 $^{+}$  T cells. (D) IL-12p40 production of CD11c $^{+}$  DCs 48 h after immunization with an aggregated formulation of OVA linked with either inactive or active TLR7/8 agonist. (E) Comparison of IL-12p40 production of CD11c $^{+}$  DCs 48h after immunization of BALB/c mice with either OVA-conjugate (active TLR7/8 agonist) or OVA plus different doses of free TLR7/8 agonist; CD11c $^{+}$  IL-12p40 $^{+}$  cells from mice that were immunized with OVA-conjugate (blue dots) were overlaid on total CD11c $^{+}$  cells (gray). (\*\*,  $p < 0.01$ , data are representative of three independent experiments).

**Figure S5**

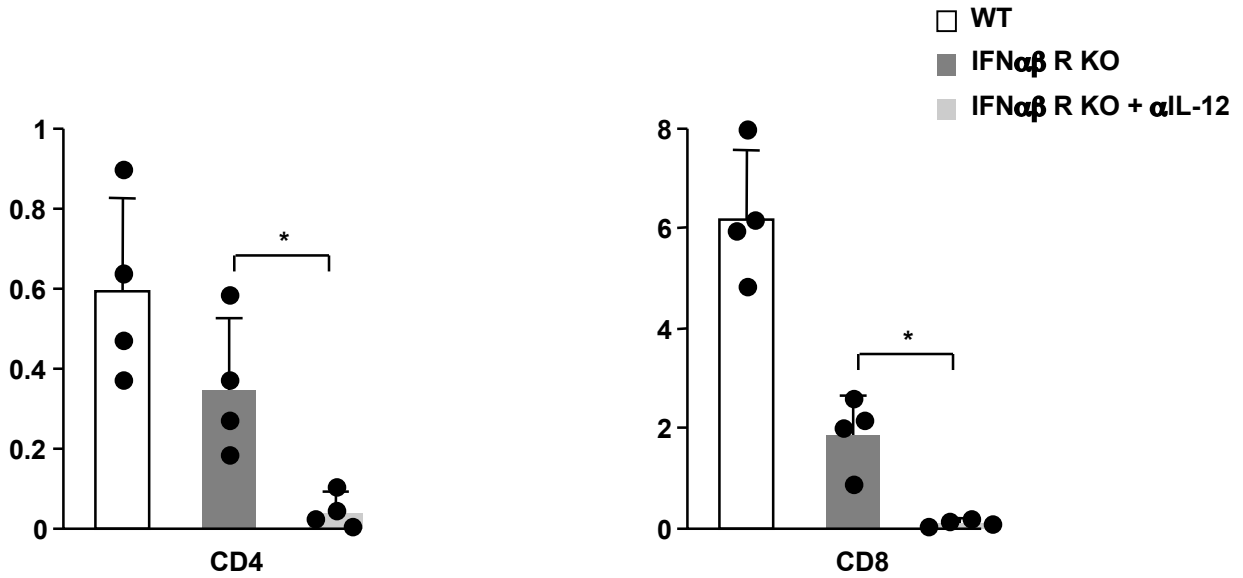

**Figure S5: Priming of OVA-specific T cells requires IL-12 and Type I IFN.** B6 and IFN $\alpha\beta$  R KO mice (n=4/group) were immunized once with 20 $\mu$ g OVA-conjugate vaccine. IFN $\alpha\beta$  R KO mice were treated i.p. with 1mg  $\alpha$ IL-12 24h before immunization. The total frequency of IFN- $\gamma$ , IL-2 or TNF $\alpha$  producing OVA-specific CD4+ and CD8+ T cells was accessed three weeks after immunization. (\*, p<0.05: data are representative of three independent experiments).

**Figure S6**

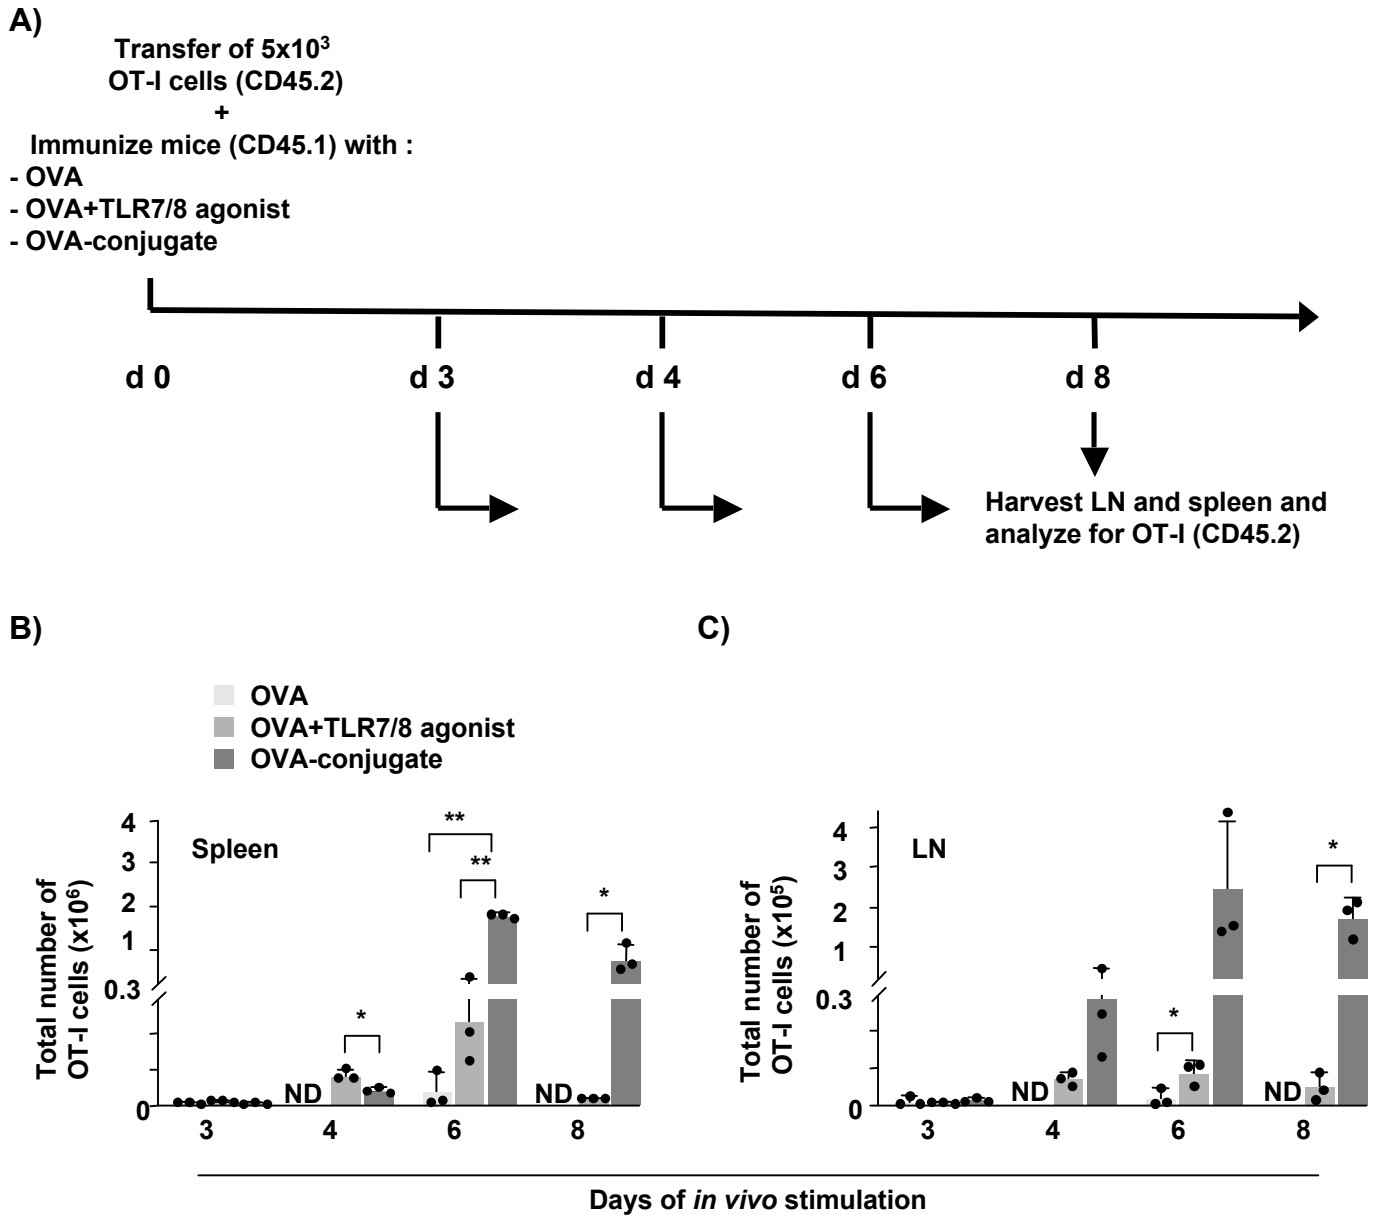

**Figure S6: Lack of T cell fitness after priming with OVA plus free TLR7/8 agonist.**

(A) OT-I cells (CD45.2) were transferred into congenic mice (CD45.1) and immunized either with OVA, OVA plus free TLR7/8 agonist or the OVA-conjugate vaccine. Total numbers of recovered OT-I cells in (B) spleen or (C) lymph nodes after indicated days of *in vivo* stimulation are shown. (\*,  $p < 0.05$ ; \*\*,  $p < 0.01$ ; ND=not done;  $n=3$ , data are representative of two independent experiments)

**Figure S7**

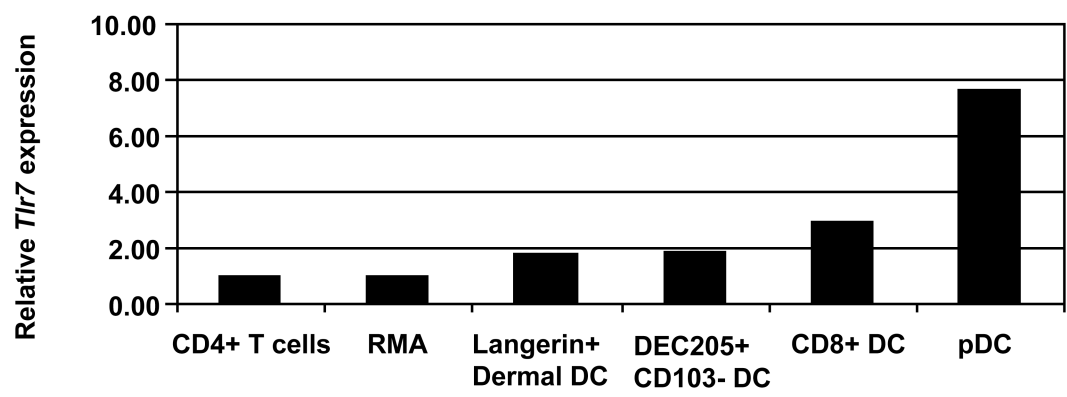

**Figure S7: *Tlr7* is expressed in pDCs of naïve LNs.** PLNs of naïve mice were pooled and the indicated DC subsets were sorted into RNAlater. RMA cell line was used as a negative controls. RNA was extracted and a quantitative RT-PCR was performed. B2M was used to normalize the RNA input levels. Data is shown as fold increase using RMA cell line expression as baseline.
